# Supplementary material for: Phenotypic Characterization of Peripheral T Cells and Their Dynamics in Scrub Typhus Patients
Source: PLoS Negl Trop Dis. 2012 Aug 14;6(8):e1789. doi: 10.1371/journal.pntd.0001789 (PMC3419201; doi:10.1371/journal.pntd.0001789)
Supplement: Table S1 — Demographic data, clinical characteristics of scrub typhus patients. (XLS) [file pntd.0001789.s006.xls]

## Sheet: Sheet1
	I. Demographic findings				II. Underlying disorders		III. Clinical Symptoms																					IV. Physical findings							V. Clinical severity				VI. Laboratory results
					Yes:1, No: 0		Yes:1, No:0, Unknown:9																					Yes:1, No: 0	*NA: not associated						*NA: not associated				*NA: not associated
Patients' ID	Gender	Age	Hospitalization (days)	Related activities	Diabetes	Cancers	Weakness	Fatigue	Fever	Chills	Headache	Dizziness	Sore throat	Cough	Sputum	Dyspnea	Chest pain	Anorexia	Nausea	Vomiting	Hydrodipsia	Dyspepsia	Diarrhea	Constipation	Abdominal pain	Myalgia	Arthralgia	Highest body temparature ('C)	Eschar	Eschar location	Skin rash	Lymphadenopathy	Conjunctival injection	Facial edema	Consciousness	Hypoxemia (treatment)	Renal disorder	Hypotension	WBC count (no. of cells/mm3)	Hemoglobin (g/dL)	Platelet count (no. of cells x 1,000/mm3)	PT (sec)	aPTT (sec)	Bilirubin (mg/dL)	AST (IU/L)	ALT (IU/L)	LDH (U/L)	Protein (g/dL)	Albumin (g/dL)
72092	F	48	4	Mountain climbing	0	1	1	1	1	0	1	0	0	1	0	0	0	1	0	0	0	0	0	0	0	1	0	38.4	1	Knee	1	0	0	0	Alert	NA	NA	NA	7300	13	177	13.3	43.4	0.4	211	118	933	6.6	3.6
157710	F	77	7	Farm work	0	0	1	0	1	1	1	0	0	0	0	0	0	1	1	0	0	0	0	0	0	0	0	38.5	1	Inguinal	1	0	0	0	Alert	Nasal prong	NA	NA	7930	11	112	12	28.2	0.74	69	50	729	6.5	3.4
255159	F	64	13	Unknown	0	0	0	0	1	1	1	0	0	0	0	0	0	0	1	0	0	0	1	0	0	0	0	39.5	1	Chest	1	0	0	0	Alert	NA	NA	NA	7440	11.3	141	11.8	31.2	0.52	43	28	744	6.5	3.2
363807	M	70	8	Farm work	0	1	1	1	1	1	1	1	0	1	1	0	0	1	1	1	1	0	0	0	0	1	1	38.4	1	Shoulder	1	0	0	1	Alert	NA	Transient axotemia	NA	5830	13.3	38	28.1	>240	0.6	83	36	952	6	2.3
456309	F	51	6	Farm work	0	0	1	1	1	1	1	0	0	0	0	0	0	1	1	0	0	0	0	0	0	1	0	38.2	1	Abdomen	0	0	0	1	Alert	NA	NA	NA	2200	12	150	11.9	33.9	0.55	93	67	623	6.2	3.9
483105	M	53	3	Gardening	0	0	1	0	1	1	1	0	0	0	0	0	0	1	0	0	0	0	0	0	0	1	0	38	1	Arm	1	0	0	0	Alert	NA	NA	NA	9500	13.9	172	12.3	34.1	0.6	47.1	65.2	803.1	6.6	3.1
484173	M	68	8	Farm work	0	0	1	0	0	0	1	1	0	0	0	0	0	0	0	0	0	0	0	0	0	0	0	37.9	1	Arm	0	0	0	0	Alert	NA	NA	NA	7450	10.7	178	11.9	37.6	0.39	85	49	1000	6.1	2.9
500639	M	69	5	Farm work	0	0	1	1	1	1	1	1	1	0	0	0	0	1	1	0	1	0	0	0	0	1	0	38.7	1	Inguinal	1	0	0	0	Alert	NA	NA	NA	9720	12.6	81	12.3	30.5	0.4	118.1	188.2	825	6.6	3
514084	M	77	1	Unknown	0	0	0	0	1	0	0	0	0	0	0	0	0	1	0	0	0	0	0	0	0	0	0	38.2	0	NA	1	0	0	0	Confusion	Nasal prong	Transient axotemia	NA	8940	10.9	48	13.5	52.2	3.1	226	64	1880	5.4	2.3
607752	F	68	3	Unknown	1	0	1	1	1	1	1	0	0	0	0	0	0	1	0	0	0	0	0	0	0	0	0	37.5	1	Chest	1	0	0	0	Alert	NA	NA	NA	7680	12.6	166	10.7	31.9	0.79	68	80	796	6.8	3.2
609916	F	54	5	Play on glassland	0	0	1	0	1	1	1	0	1	1	0	0	0	0	0	0	0	0	0	0	0	0	0	39.3	1	Thigh	0	0	0	0	Alert	NA	NA	NA	5750	12.5	183	12.8	25.9	0.1	33	37	380	6.2	3.3
675715	F	50	6	Farm work	0	0	1	0	1	1	1	0	0	1	1	1	0	1	0	0	0	1	0	0	0	0	0	37	1	Thigh	1	0	1	1	Alert	NA	NA	NA	10500	11.8	210	12.6	28.5	0.1	61	105	744	6.6	3.2
707498	F	48	6	Farm work	0	0	1	0	1	1	1	1	1	0	0	0	1	1	1	0	1	0	0	0	0	1	1	38	1	Chest	1	0	0	1	Alert	NA	NA	NA	1600	13.5	68	11.5	40.8	0.9	147	94.1	1237.9	7.1	3.6
739341	F	57	4	House work	1	0	1	1	1	1	1	0	0	0	0	0	0	1	0	0	1	0	0	0	0	1	1	38.2	1	Abdomen	1	0	0	1	Alert	NA	NA	NA	4700	12.1	122	12.7	28.5	0.6	62.7	94.1	610.8	7.2	3.8
754434	M	62	4	Farm work	1	0	1	1	1	1	0	1	0	0	0	1	1	1	0	0	1	0	0	1	1	1	0	38.9	1	Knee	1	0	0	0	Alert	NA	NA	NA	4200	15.3	104	13.8	34.2	2.7	127.6	65.2	816.7	6.6	3.1
784018	F	57	5	Mountain climbing	0	0	1	1	1	1	1	1	1	0	0	1	1	1	0	0	1	0	0	0	0	1	1	38.1	1	Shoulder	1	0	0	1	Alert	NA	NA	NA	10100	10.6	143	12.4	30.2	0.6	131	159.8	760.1	7.3	3.1
802113	F	34	4	Farm work	0	0	1	1	1	1	1	1	0	1	0	0	1	1	1	0	1	0	0	1	0	1	1	37	1	Arm	1	0	0	1	Alert	NA	NA	NA	5900	10.4	129	12.2	30.5	<0.3	70.4	56.5	610.8	7	3.1
821166	F	59	8	Farm work	0	0	1	1	1	1	1	1	0	0	0	0	0	1	1	1	1	0	0	0	1	1	1	39.5	1	Chest	1	0	1	1	Alert	NA	NA	NA	6700	12.5	124	11.7	26.4	0.4	64.1	77.8	691.4	7.1	3
843312	M	72	5	Mountain climbing	0	1	1	0	1	0	0	1	0	0	0	0	0	0	0	0	0	0	0	0	0	0	0	39	1	Chest	1	0	0	0	Alert	NA	Transient axotemia	NA	5400	12.7	224	13.1	35.5	0.97	61	62	723	6.5	3
967910	F	54	6	House work	0	0	1	1	1	1	1	1	0	0	0	0	0	1	1	1	1	0	0	0	0	1	0	39.1	1	Abdomen	1	0	0	1	Alert	NA	NA	NA	8490	15	209	11.6	24.3	0.8	63	119	504.1	7.4	4.4
1007177	M	60	3	Farm work	0	0	1	1	1	1	1	0	0	0	0	0	0	1	0	0	1	0	0	1	0	1	1	38.9	1	Face	1	0	1	1	Alert	NA	NA	NA	8300	14.5	112	12.1	37.1	0.8	77.6	80	1109.5	7.8	3.7
1135615	M	69	35	Unknown	0	0	1	1	1	1	1	0	0	0	0	1	1	0	0	0	0	0	0	0	0	0	0	39.5	1	Shoulder	1	0	1	1	Alert	Facial mask	NA	Yes	11700	10.6	129	13.9	29.7	0.8	103.9	59.5	780.2	5.9	2.9
1136057	M	39	6	Mountain climbing	0	0	1	1	1	1	1	0	1	0	0	0	0	1	0	0	1	0	0	0	0	1	0	38.7	1	Knee	1	1	0	0	Alert	NA	NA	NA	2900	17.9	68	11.9	32	0.4	30.2	27.6	547.5	8.8	3.8
1136916	F	31	6	Farm work	0	0	1	1	1	1	0	0	0	0	0	0	0	1	1	1	1	0	0	0	0	1	0	38.4	1	Ankle	1	0	0	0	Alert	NA	NA	NA	3600	12.5	128	12.3	29.8	0.4	49	50	463	7.5	3.6
1136985	F	78	9	Play on glassland	0	0	1	0	1	1	0	0	0	0	0	0	0	1	1	1	0	0	0	0	0	0	0	38.8	1	Chest	0	0	0	0	Alert	NA	NA	NA	4100	11.6	127	12.4	29	0.7	64.4	31.1	945.7	7.4	3.4
1137129	F	29	4	Play on glassland	0	0	1	1	1	0	0	0	0	0	0	0	0	1	1	1	1	0	0	0	0	0	0	39.4	1	Peroneal	1	0	1	1	Alert	NA	NA	NA	9300	11.6	124	13.2	28.8	0.5	35.3	37.9	490.2	6.7	2.7
1137140	F	78	18	Unknown	0	0	1	1	1	1	1	0	1	0	1	1	1	1	0	0	1	0	0	0	1	0	0	39.6	1	Arm	1	0	0	1	Alert	Nasal prong	NA	NA	14700	14.1	154	9.6	29.2	0.6	65	83	661	6.3	2.6
1137476	F	69	85	Farm work	1	0	1	1	1	1	0	0	0	0	0	1	0	0	0	0	0	0	0	0	0	0	0	38.3	0	NA	0	0	0	0	Drowsy	Facial mask	Transient axotemia	NA	11920	15.9	127	16.2	28.7	0.63	26	37	836	7.3	2.8
1137996	F	64	8	Farm work	0	0	1	1	1	1	0	0	0	0	0	0	0	0	0	0	0	0	0	0	0	0	0	37.3	0	NA	0	0	0	0	Alert	NA	NA	NA	6300	10.2	320	13	32.9	1.1	46.5	54.1	539.4	8.1	3
1149217	M	66	10	Farm work	0	0	1	1	1	1	1	0	1	1	0	0	0	1	0	0	1	0	0	0	0	1	0	39	1	Inguinal	1	0	1	0	Alert	NA	NA	NA	9500	14.3	140	11.8	34.5	0.7	285.1	334	1474.1	7.1	3.2
1150494	M	65	5	Farm work	0	0	1	1	1	1	1	1	0	0	0	0	0	1	0	0	1	0	0	0	0	1	1	37.8	1	Shoulder	1	0	1	1	Alert	NA	NA	NA	3400	15	115	12.2	35.8	0.6	71.2	52.9	859.6	6.9	161
1201127	M	43	4	Mountain climbing	0	0	0	0	0	0	1	0	0	0	0	0	0	0	0	0	0	0	0	0	0	0	0	39.1	1	Scrotum	1	0	0	0	Alert	NA	NA	NA	2360	12.6	34	11.9	34.4	0.62	69	35	503	6.6	3.6
1201638	F	66	4	Farm work	0	0	1	0	1	1	1	0	0	0	0	0	0	1	0	0	0	0	0	0	0	0	0	38.9	1	Shoulder	1	0	0	0	Alert	NA	NA	NA	4400	14	241	12.4	27.6	0.1	28	26	495	7.6	4.4
1201937	F	57	4	Farm work	0	0	1	1	1	1	1	0	0	1	0	0	0	1	0	0	0	0	0	0	0	0	0	39.7	1	Knee	0	0	0	0	Alert	NA	NA	NA	7760	14.6	172	12.6	33.7	0.6	70	69	830	7.7	4.2
Healthy Controls
HC1	M	67
HC2	F	67
HC3	M	62
HC4	F	64
HC5	F	60
HC6	M	60
HC7	M	60
HC8	M	60
HC9	F	67
[truncated: 14 more columns]
